# Supplementary material for: Biogeography of the Relationship between the Child Gut Microbiome and Innate Immune System
Source: PubMed Central journal article supplement (PMC7845628; doi:10.1128/mbio.03079-20), 2021-01-12

# sPLS: Belgium

## A

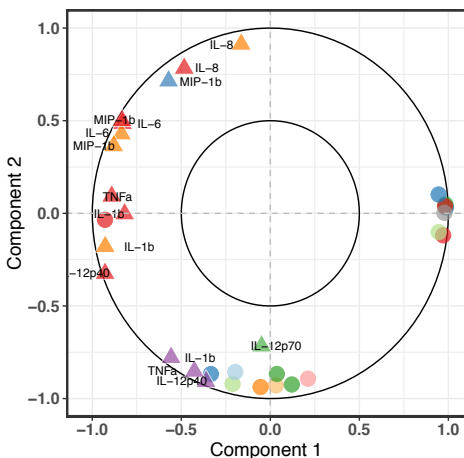

Stimulus

- ▲ PAM
- ▲ PGN
- ▲ pIC
- ▲ LPS
- ▲ R848

OTU Family

- F\_Prevotellaceae
- F\_Lachnospiraceae
- F\_Bacteroidaceae
- F\_Ruminococcaceae
- K\_Bacteria
- P\_Firmicutes
- F\_Erysipelotrichaceae
- C\_Clostridia
- F\_Coriobacteriaceae

## B

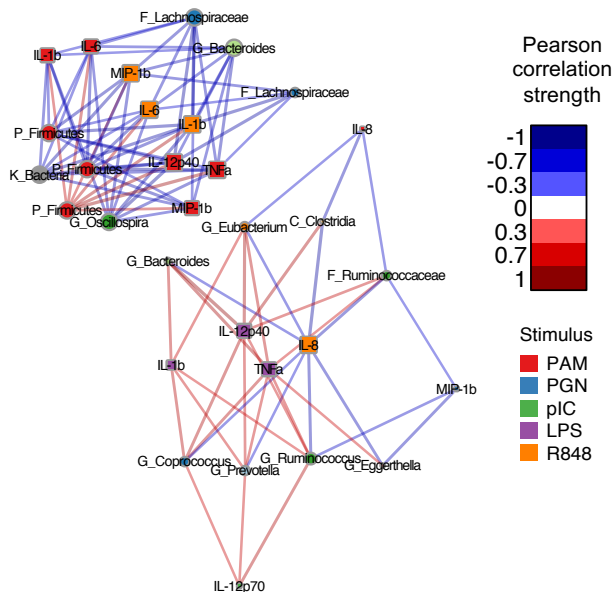

## C

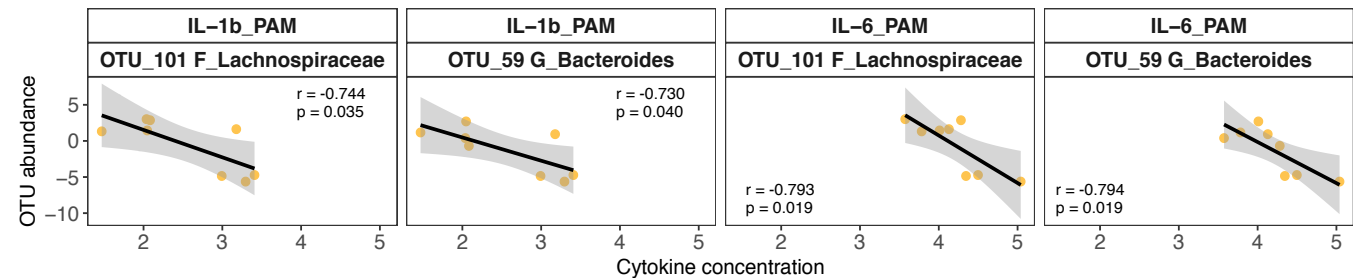

# sPLS: Canada

## A

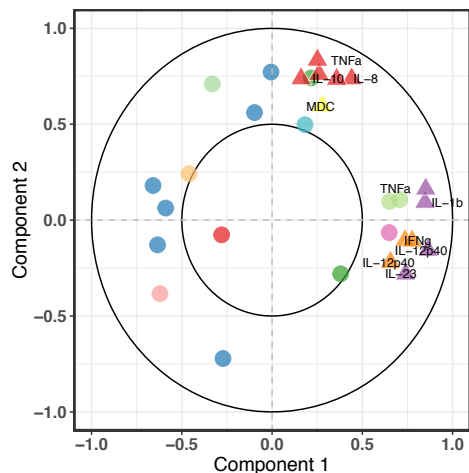

## B

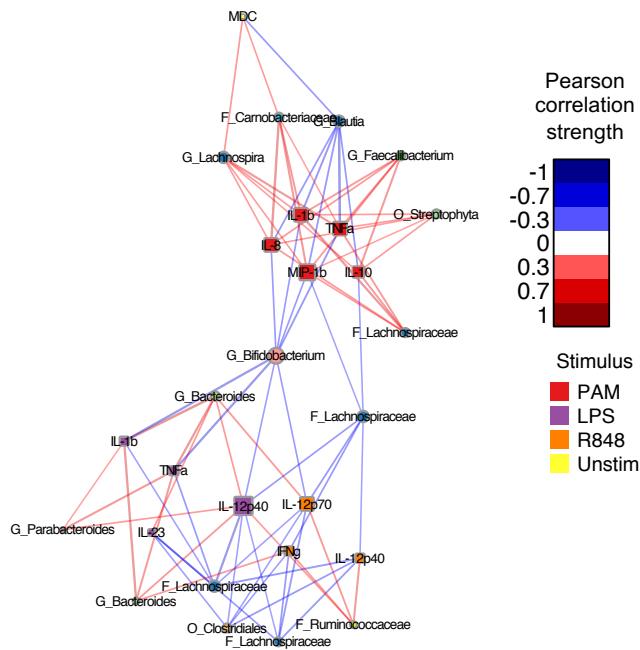

## C

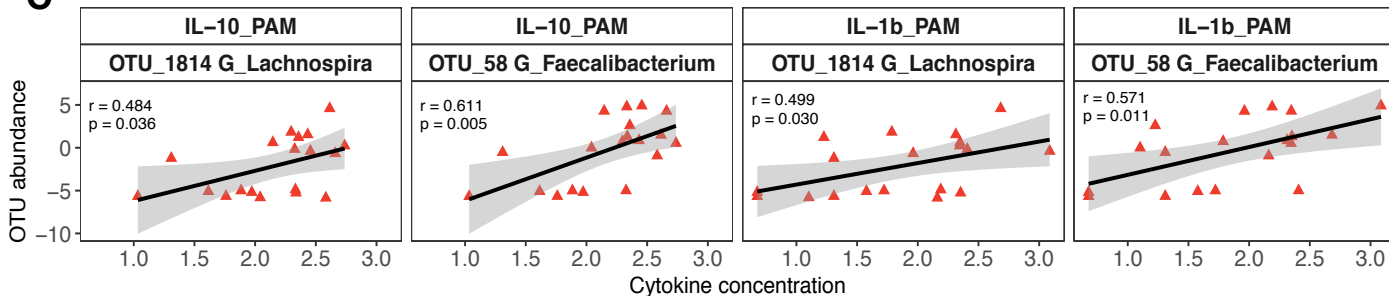

# sPLS: Ecuador

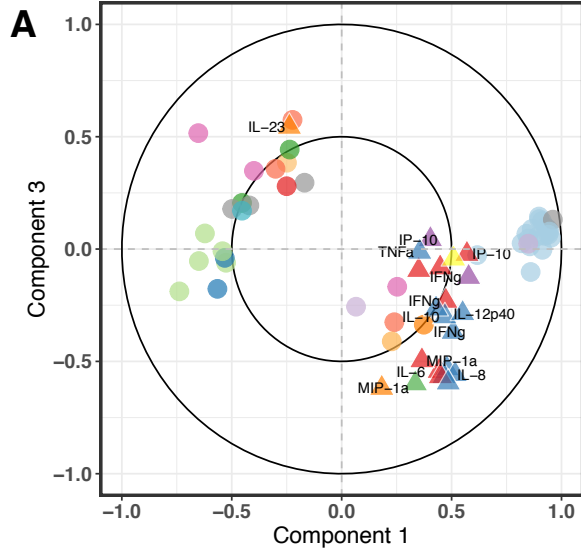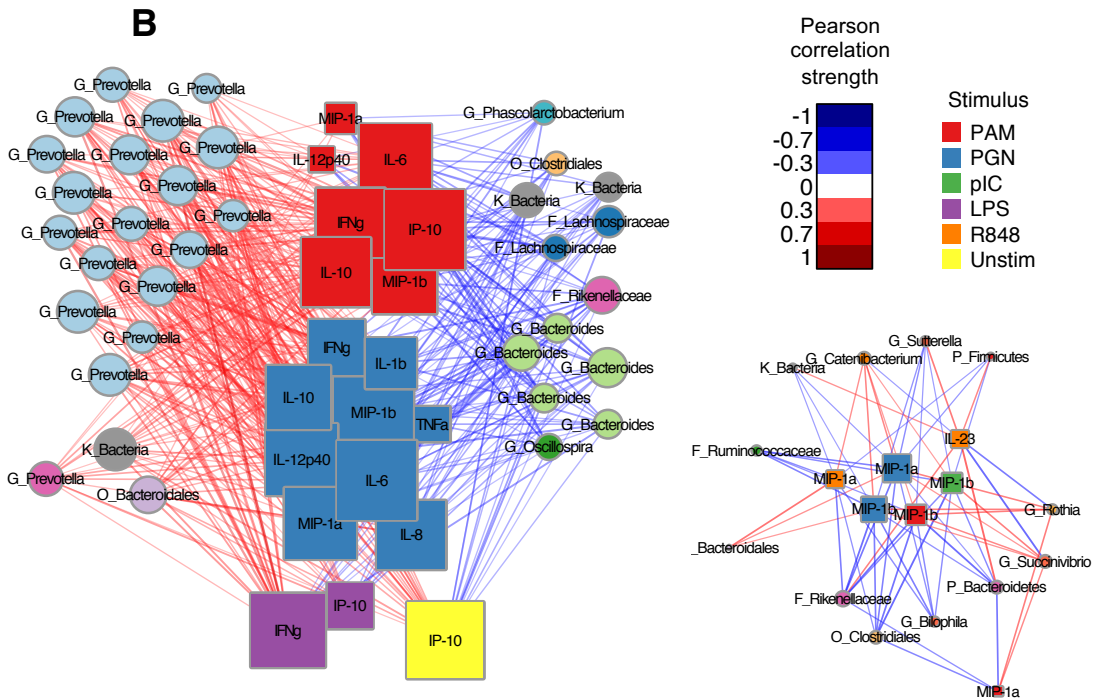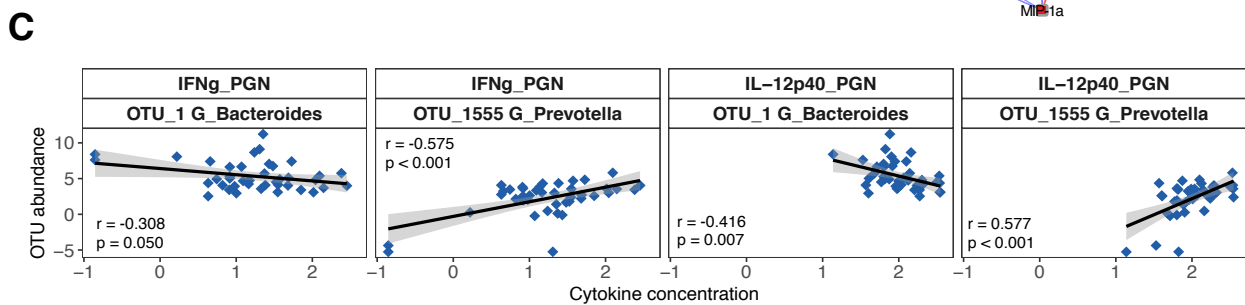

# sPLS: South Africa

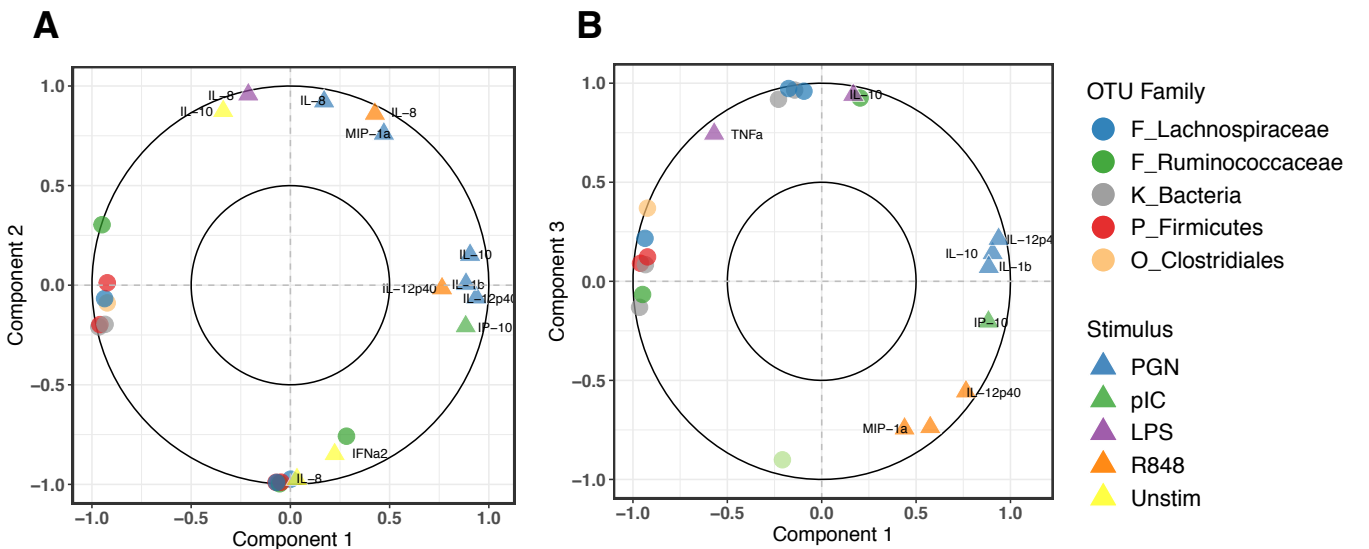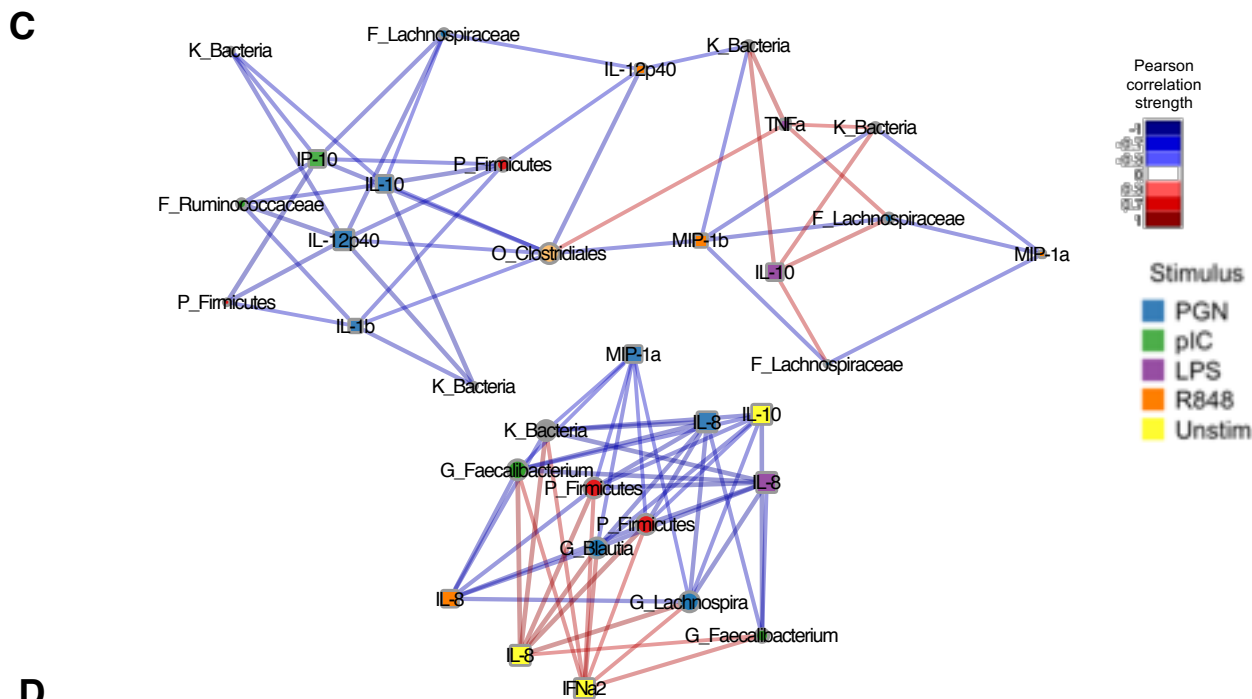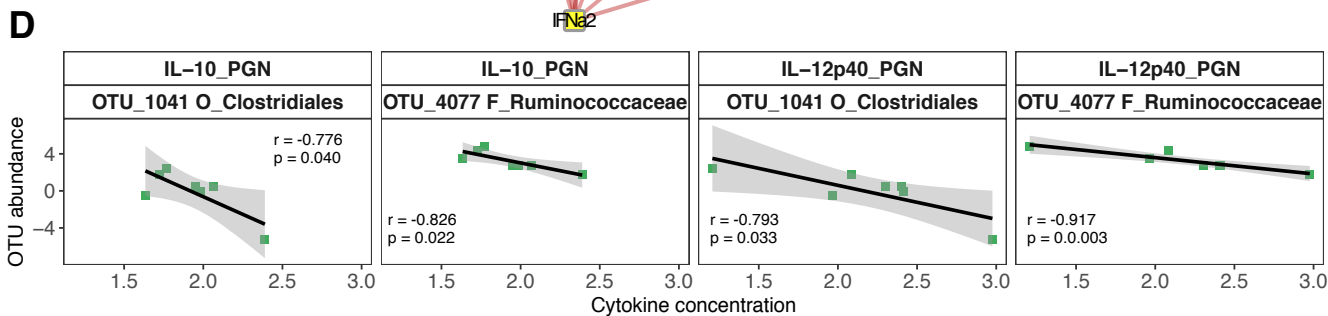

Supplement: mBio.03079-20-sf004.pdf [file mBio.03079-20-sf004.pdf]
